# Supplementary material for: ProdMX: Rapid query and analysis of protein functional domain based on compressed sparse matrices
Source: PubMed Central journal article supplement (PMC7719867; doi:10.1016/j.csbj.2020.10.023), 2020-11-24
Supplement: mmc1.pdf [file mmc1.pdf]

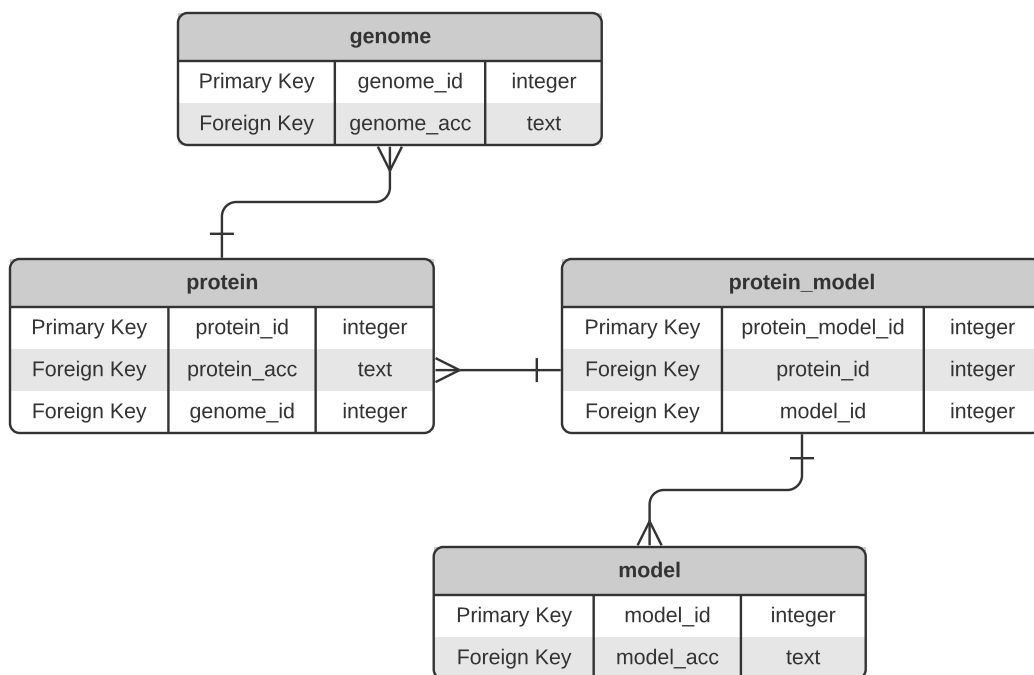

**Supplementary File S1 A database schema representing sparse matrix.**
